# Supplementary material for: Reduced fluorescence quenching of coumarin 102 at higher phenol mole fractions in cyclohexane–phenol and anisole–phenol solvent mixtures: role of competitive hydrogen bonding
Source: Royal Society of Chemistry journal article supplement (doi:10.1039/c4ra11251b), 2014-10-29
Supplement: c4ra11251b1.pdf [file c4ra11251b1.pdf]

## Electronic Supplementary Information

# Reduced fluorescence quenching of coumarin 102 at higher phenol mole fractions in cyclohexane-phenol and anisole-phenol solvent mixtures: Role of competitive hydrogen bonding

*Nabajeet Barman and Kalyanasis Sahu\**

Department of Chemistry, Indian Institute of Technology Guwahati, Guwahati 781039, Assam, India

\* Email: [ksahu@iitg.ernet.in](mailto:ksahu@iitg.ernet.in)

### Derivation of Equation 1:

The variation of the emission maxima in frequency  $\nu_{em}^{max}$  (in  $\text{cm}^{-1}$ ) against mole fraction ( $x$ ) can be conveniently fitted by the equation. Here,  $\nu_{em}^{max}(x)$  and  $\nu_{em}^{max}(x=1)$  are the emission maxima at a particular mole fraction of phenol ( $x$ ) and in neat phenol ( $x=1$ ), respectively.

$$\frac{d[\nu_{em}^{max}(x) - \nu_{em}^{max}(x=1)]}{dx} = -k[\nu_{em}^{max}(x) - \nu_{em}^{max}(x=1)]$$

$$\text{Or, } \frac{dy}{dx} = -ky, \text{ where } y = \nu_{em}^{max}(x) - \nu_{em}^{max}(x=1)$$

Integrating we obtain

$$y = y_0 e^{-kx}$$

$$\text{Or, } \nu_{em}^{max}(x) - \nu_{em}^{max}(x=1) = [\nu_{em}^{max}(0) - \nu_{em}^{max}(x=1)] e^{-kx}$$

$$\text{Or, } \nu_{em}^{max}(x) = \nu_{em}^{max}(x=1) + [\nu_{em}^{max}(0) - \nu_{em}^{max}(x=1)] e^{-kx}$$

Table S1: Fitting parameters of emission maxima against mole fractions in the three solvent mixtures using the above equation. Within bracket represents the standard error of the respective parameters.

| Solvent Mixture    | $\nu_{em}^{max}(x=1)$ ( $\text{cm}^{-1}$ ) | $\Delta\nu$ ( $\text{cm}^{-1}$ ) | $k$        |
|--------------------|--------------------------------------------|----------------------------------|------------|
| Cyclohexane-Phenol | 21320 (87)                                 | 3521 (94)                        | 25.0 (2.0) |
| Anisole-Phenol     | 21353 (77)                                 | 1606 (96)                        | 27.0 (4.5) |

|                     |             |            |            |
|---------------------|-------------|------------|------------|
| Cyclohexane-Anisole | 22998 (106) | 1709 (123) | 3.3 (0.06) |
|---------------------|-------------|------------|------------|
